# Supplementary material
Source: PubMed Central journal article supplement (PMC8571034)
Supplement: NIHMS1730661-supplement-Suppl_Table_1.pdf [file NIHMS1730661-supplement-Suppl_Table_1.pdf]

**Supplemental Table 1. Tracer injection components presented in Fig. 1 and 2.**

| Injection Components (10 uL total volume) | Cell Association (Flow Cytometry) Data   |                                  | Total LN accumulation (Tissue Homogenate) Data |                                  |
|-------------------------------------------|------------------------------------------|----------------------------------|------------------------------------------------|----------------------------------|
|                                           | Fluorescent Dye Excitation/Emission (nm) | Injection Concentration          | Fluorescent Dye Excitation/Emission (nm)       | Injection Concentration          |
| 500 nm sphere                             | Yellow-green<br>505/515                  | $1.9 \times 10^{-5} \mu\text{M}$ | Red<br>580/605                                 | $1.9 \times 10^{-5} \mu\text{M}$ |
| 500 kDa (30 nm) dextran                   | AF 700<br>700/720                        | 4.8 $\mu\text{M}$                | AF 700<br>700/720                              | 4.8 $\mu\text{M}$                |
| 40 kDa (10 nm) dextran                    | TRITC<br>555/575                         | 4.8 $\mu\text{M}$                | TRITC<br>555/575                               | 4.8 $\mu\text{M}$                |
