# Supplementary material
Source: PubMed Central journal article supplement (PMC8571034)
Supplement: NIHMS1730661-supplement-Suppl_Table_2.pdf [file NIHMS1730661-supplement-Suppl_Table_2.pdf]

**Supplemental Table 2. Tracer and NO treatment injection components in Fig. 3.**

| Injection Components<br>(40 uL total volume) | Cell Association (Flow Cytometry) Data         |                                                              | Total LN accumulation (Tissue Homogenate) Data |                                       |
|----------------------------------------------|------------------------------------------------|--------------------------------------------------------------|------------------------------------------------|---------------------------------------|
|                                              | Fluorescent Dye<br>Excitation/Emission<br>(nm) | Injected<br>Quantity                                         | Fluorescent Dye<br>Excitation/Emission<br>(nm) | Injected Quantity                     |
| 500 nm sphere                                | Yellow-green<br>505/515                        | 1.2 x 10 <sup>8</sup> spheres<br>(4.8 x 10 <sup>-5</sup> µg) | Red<br>580/605                                 | 1.2 x 10 <sup>8</sup> spheres         |
| 500 kDa (30 nm)<br>dextran                   | TRITC<br>555/575                               | 23.8 µg                                                      | AF 647<br>651/672                              | 23.8 µg                               |
| 10 kDa (5 nm)<br>dextran                     | AF 647<br>651/672                              | 3 µg                                                         | AF 610<br>603/623                              | 3 µg                                  |
| Treatment                                    | *SNO-NP                                        | 800 nmol NO                                                  | N/A                                            | 800 nmol NO                           |
|                                              | *SH-NP                                         | Dose-matched NP<br>quantity to SNO-NP                        | N/A                                            | Dose-matched NP<br>quantity to SNO-NP |
|                                              | *SNAP                                          | 800 nmol NO                                                  | N/A                                            | 800 nmol NO                           |

\*Only one treatment type per injection
