# Supplementary material
Source: PubMed Central journal article supplement (PMC8571034)
Supplement: NIHMS1730661-supplement-Suppl_Table_3.pdf [file NIHMS1730661-supplement-Suppl_Table_3.pdf]

**Supplemental Table 3. Cell markers used for flow cytometry cell subset identification in LN tracer association data in Fig. 1 and 2**

| Cell subset name | Cell markers used for identification |
|------------------|--------------------------------------|
| CD3              | CD45+CD3+                            |
| B220             | CD45+B220+                           |
| CD11c            | CD45+CD11c+                          |
| F4/80            | CD45+F4/80+                          |
