# Supplementary material
Source: PubMed Central journal article supplement (PMC8571034)
Supplement: NIHMS1730661-supplement-Suppl_Table_4.pdf [file NIHMS1730661-supplement-Suppl_Table_4.pdf]

**Supplemental Table 4. Cell markers used for flow cytometry cell subset identification for *in vitro* tracer association data in Suppl. Fig. 2.**

| Cell subset name | Cell markers used for identification                                                       |
|------------------|--------------------------------------------------------------------------------------------|
| T Cell           | CD45 <sup>+</sup> CD3 <sup>+</sup>                                                         |
| B Cell           | CD45 <sup>+</sup> CD3 <sup>-</sup> CD11b <sup>-</sup> CD11c <sup>-</sup>                   |
| Dendritic Cell   | CD45 <sup>+</sup> CD3 <sup>-</sup> CD11c <sup>+</sup>                                      |
| Macrophage       | CD45 <sup>+</sup> CD3 <sup>-</sup> CD11b <sup>+</sup> F4/80 <sup>-</sup> SSC <sup>lo</sup> |
