# Supplementary material
Source: PubMed Central journal article supplement (PMC8571034)
Supplement: NIHMS1730661-supplement-Suppl_Table_5.pdf [file NIHMS1730661-supplement-Suppl_Table_5.pdf]

**Supplemental Table 5. Cell markers used for flow cytometry cell subset identification in NO treatment tracer association data in Fig. 3.**

| Cell subset name | Cell markers used for identification                                                                                             |
|------------------|----------------------------------------------------------------------------------------------------------------------------------|
| T Cell           | CD45 <sup>+</sup> CD3 <sup>+</sup> B220 <sup>-</sup>                                                                             |
| B Cell           | CD45 <sup>+</sup> B220 <sup>+</sup> CD3 <sup>-</sup> CD11b <sup>-</sup>                                                          |
| cDC              | CD45 <sup>+</sup> CD11c <sup>+</sup> B220 <sup>-</sup>                                                                           |
| pDC              | CD45 <sup>+</sup> CD11c <sup>+</sup> B220 <sup>+</sup>                                                                           |
| SSM              | CD45 <sup>+</sup> B220 <sup>-</sup> CD3 <sup>-</sup> CD11b <sup>+</sup> CD11c <sup>+</sup> CD169 <sup>+</sup> F4/80 <sup>-</sup> |
| MCM              | CD45 <sup>+</sup> B220 <sup>-</sup> CD3 <sup>-</sup> CD11b <sup>+</sup> CD11c <sup>+</sup> CD169 <sup>+</sup> F4/80 <sup>+</sup> |
| MSM              | CD45 <sup>+</sup> B220 <sup>-</sup> CD3 <sup>-</sup> CD11b <sup>+</sup> CD11c <sup>+</sup> CD169 <sup>+</sup> F4/80 <sup>+</sup> |
| dDC              | CD45 <sup>+</sup> CD11c <sup>hi</sup> DEC205 <sup>+</sup>                                                                        |
| LC               | CD45 <sup>+</sup> CD11c <sup>lo</sup> DEC205 <sup>+</sup>                                                                        |
