# Supplementary material
Source: PubMed Central journal article supplement (PMC8571034)

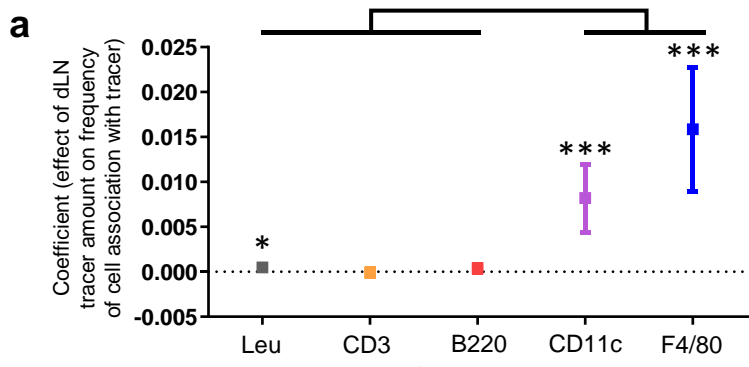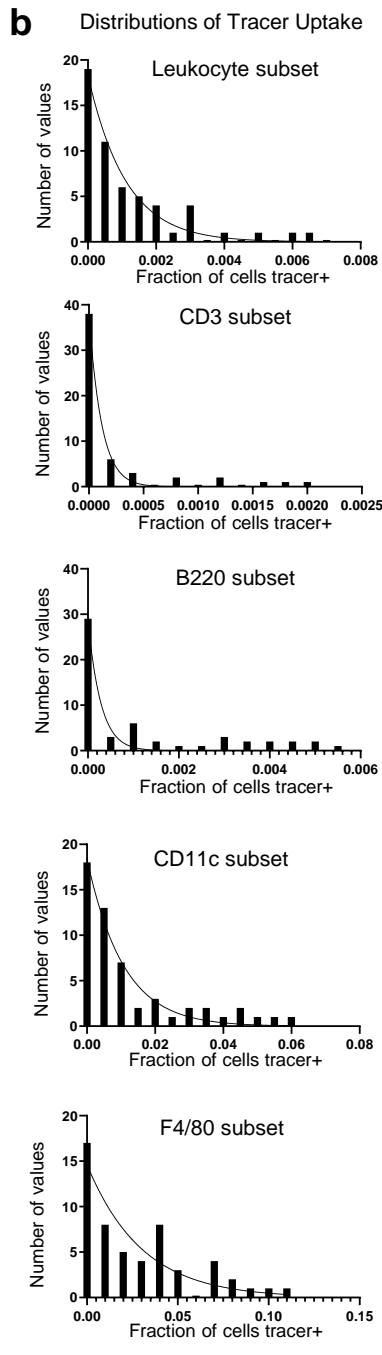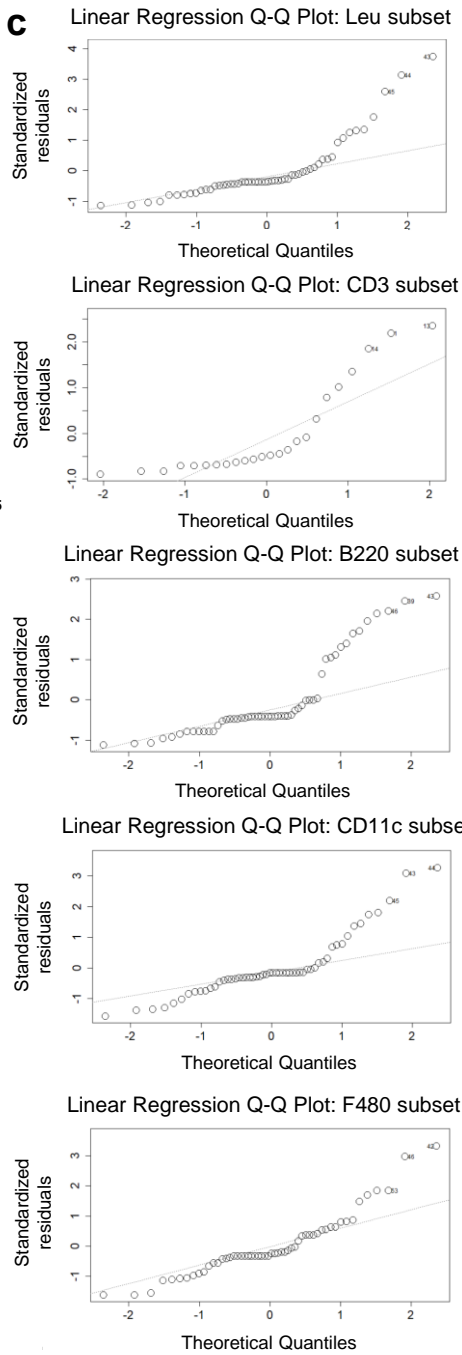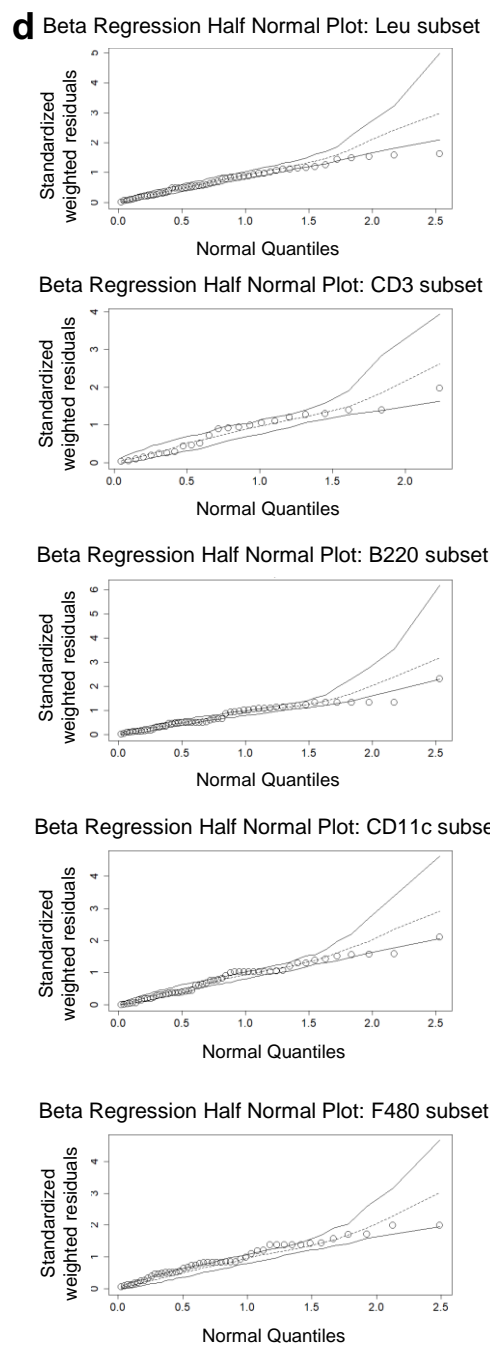

Supplement: NIHMS1730661-supplement-Suppl_Fig_1.pdf [file NIHMS1730661-supplement-Suppl_Fig_1.pdf]

**a**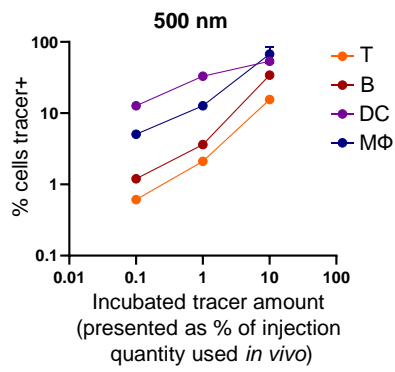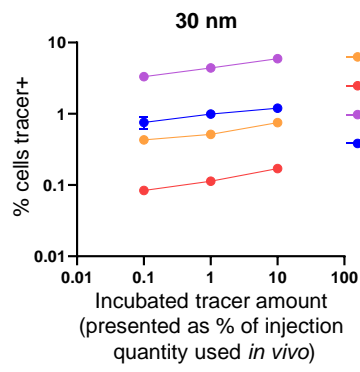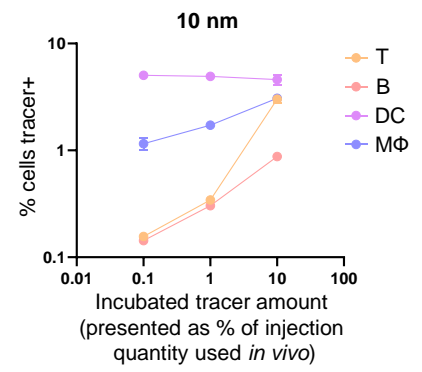**b**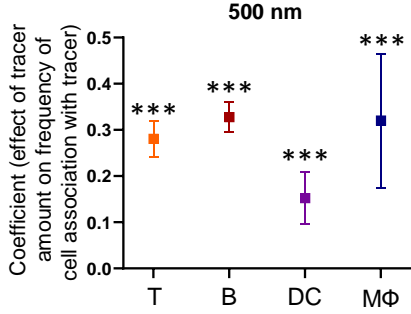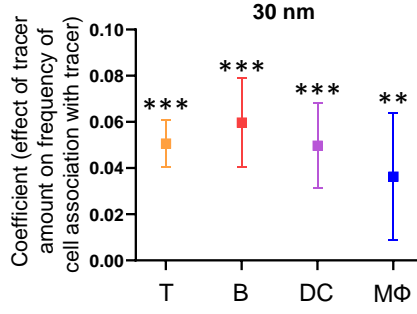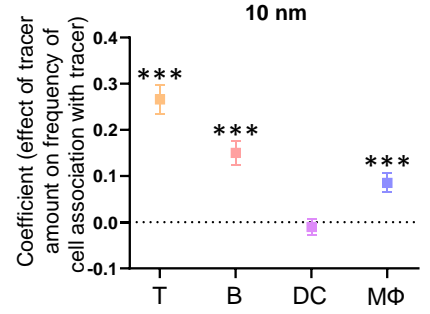

Supplement: NIHMS1730661-supplement-Suppl_Fig_2.pdf [file NIHMS1730661-supplement-Suppl_Fig_2.pdf]

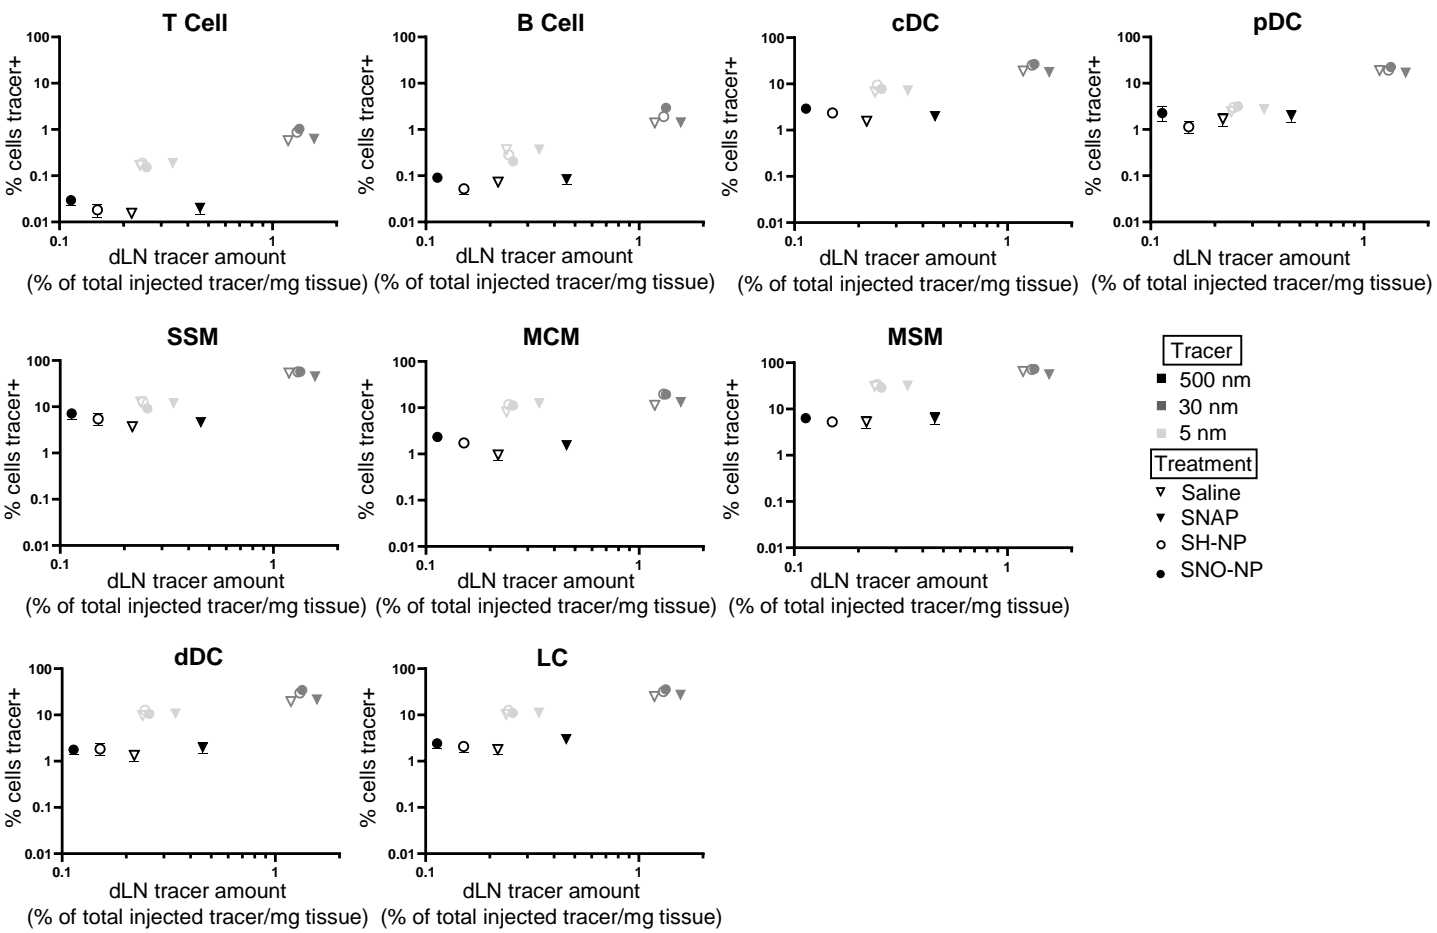

Supplement: NIHMS1730661-supplement-Suppl_Fig_3.pdf [file NIHMS1730661-supplement-Suppl_Fig_3.pdf]
